# Supplementary material for: Synthesis and characterisation of cobalt(ii) phosphonate cage complexes utilizing carboxylates and pyridonates as co-ligands
Source: Royal Society of Chemistry journal article supplement (doi:10.1039/c2dt31612a), 2012-01-01
Supplement: c2dt31612a.pdf [file c2dt31612a.pdf]

## Electronic supplementary information (ESI)

### Synthesis and characterisation of cobalt(II) phosphonate cage complexes utilizing carboxylates and pyridonates as co-ligands.\*\*

Stuart K. Langley,<sup>a</sup> Madeleine Helliwell,<sup>a</sup> Simon J. Teat<sup>b</sup> and Richard E. P. Winpenny<sup>a,c\*</sup>

- a. School of Chemistry, The University of Manchester, Oxford Road, Manchester, M13 9PL, UK. E-mail: [richard.winpenny@man.ac.uk](mailto:richard.winpenny@man.ac.uk)*
- b. Advanced Light Source, Lawrence Berkeley Laboratory, 1 Cyclotron Road, MS2-400, Berkeley, California 94720, USA.*
- c. The Photon Science Institute, The University of Manchester, Oxford Road, Manchester, M13 9PL, UK*

**Table S1.** Bond valence sum calculations for **1** (representative of the family of compounds **1** - **3**, **13** and **14**). The oxidation state for each metal is the whole number closest to the value in bold.

| Atoms | Co(II)      | Co(III) |
|-------|-------------|---------|
| Co1   | <b>2.00</b> | 1.87    |
| Co2   | <b>1.91</b> | 1.73    |
| Co3   | <b>1.86</b> | 1.76    |
| Co4   | <b>1.97</b> | 1.73    |
| Co5   | <b>1.81</b> | 1.68    |

**Table S2.** Bond valence sum calculations for **4** (representative of compounds **4** - **9**). The oxidation state for each metal is the whole number closest to the value in bold.

| Atoms | Co(II)      | Co(III) |
|-------|-------------|---------|
| Co1   | <b>1.91</b> | 1.85    |
| Co2   | <b>1.99</b> | 1.86    |
| Co3   | <b>1.92</b> | 1.79    |
| Co4   | <b>1.93</b> | 1.71    |
| Co5   | <b>1.98</b> | 1.76    |

**Table S3.** Bond valence sum calculations for **10**. The oxidation state for each metal is the whole number closest to the value in bold.

| Atoms | Co(II)      | Co(III) |
|-------|-------------|---------|
| Co1   | <b>1.96</b> | 1.68    |
| Co2   | <b>1.93</b> | 1.67    |
| Co3   | <b>1.99</b> | 1.70    |
| Co4   | <b>1.82</b> | 1.55    |
| Co5   | <b>1.91</b> | 1.77    |
| Co6   | <b>1.99</b> | 1.74    |
| Co7   | <b>1.96</b> | 1.72    |
| Co8   | <b>2.05</b> | 1.80    |
| Co9   | <b>1.93</b> | 1.69    |
| Co10  | <b>1.70</b> | 1.76    |

BVS calculations for the O atoms O3, O13 and O30 of 0.82, 1.15 and 1.19 respectively confirm that these are hydroxide ions. (The BVS values for O atoms of  $\text{O}^{2-}$ ,  $\text{OH}^-$ , and  $\text{H}_2\text{O}$  groups are typically 1.8-2.0, 1.0-1.2, and 0.2-0.4, respectively).

**Table S4.** Bond valence sum calculations for **11**. The oxidation state for each metal is the whole number closest to the value in bold.

| Atoms | Co(II)      | Co(III) |
|-------|-------------|---------|
| Co1   | <b>1.89</b> | 1.79    |
| Co2   | <b>1.86</b> | 1.73    |
| Co3   | <b>1.90</b> | 1.79    |
| Co4   | <b>1.88</b> | 1.74    |
| Co5   | <b>1.88</b> | 1.77    |
| Co6   | <b>1.87</b> | 1.75    |
| Co7   | <b>1.81</b> | 1.66    |
| Co8   | <b>1.80</b> | 1.65    |
| Co9   | <b>1.81</b> | 1.66    |

BVS calculation for the O atom O25 of 0.99 confirms that this is a hydroxide ion. (The BVS values for O atoms of  $O^{2-}$ ,  $OH^-$ , and  $H_2O$  groups are typically 1.8-2.0, 1.0-1.2, and 0.2-0.4, respectively).

**Table S5.** Bond valence sum calculations for **12**. The oxidation state for each metal is the whole number closest to the value in bold.

| Atoms | Co(II)      | Co(III) |
|-------|-------------|---------|
| Co1   | <b>1.88</b> | 1.85    |
| Co2   | <b>1.80</b> | 1.70    |
| Co3   | <b>1.88</b> | 1.65    |
| Co4   | <b>1.95</b> | 1.71    |
| Co5   | <b>2.00</b> | 1.76    |
| Co6   | <b>1.63</b> | 1.72    |
| Co7   | <b>2.04</b> | 1.80    |
| Co8   | <b>2.05</b> | 1.80    |
| Co9   | <b>1.79</b> | 1.70    |

BVS calculation for the O atom O28 of 1.01 confirms that this is a hydroxide ion. (The BVS values for O atoms of  $O^{2-}$ ,  $OH^-$ , and  $H_2O$  groups are typically 1.8-2.0, 1.0-1.2, and 0.2-0.4, respectively).

**Table S6.** Bond valence sum calculations for **15**. The oxidation state for each metal is the whole number closest to the value in bold.

| Atoms | Co(II)      | Co(III) |
|-------|-------------|---------|
| Co1   | <b>1.91</b> | 1.78    |
| Co2   | <b>1.92</b> | 1.80    |
| Co3   | <b>1.88</b> | 1.72    |
| Co4   | <b>2.00</b> | 1.78    |
| Co5   | <b>1.91</b> | 1.82    |
| Co6   | <b>1.90</b> | 1.78    |

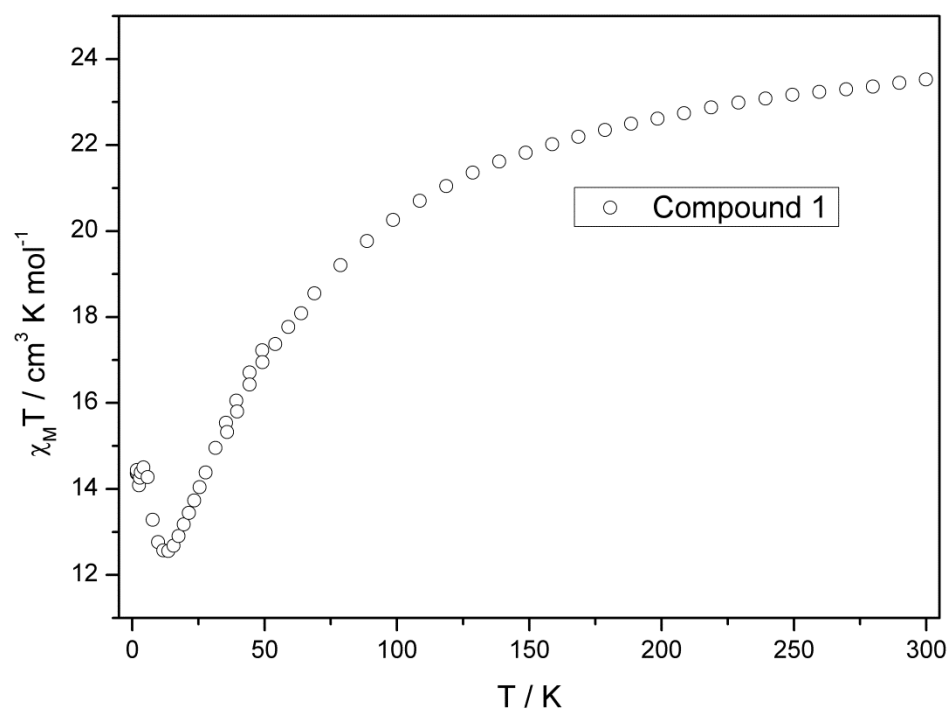

**Figure S1.** Plot of  $\chi_M T$  vs  $T$  for compound **1**.

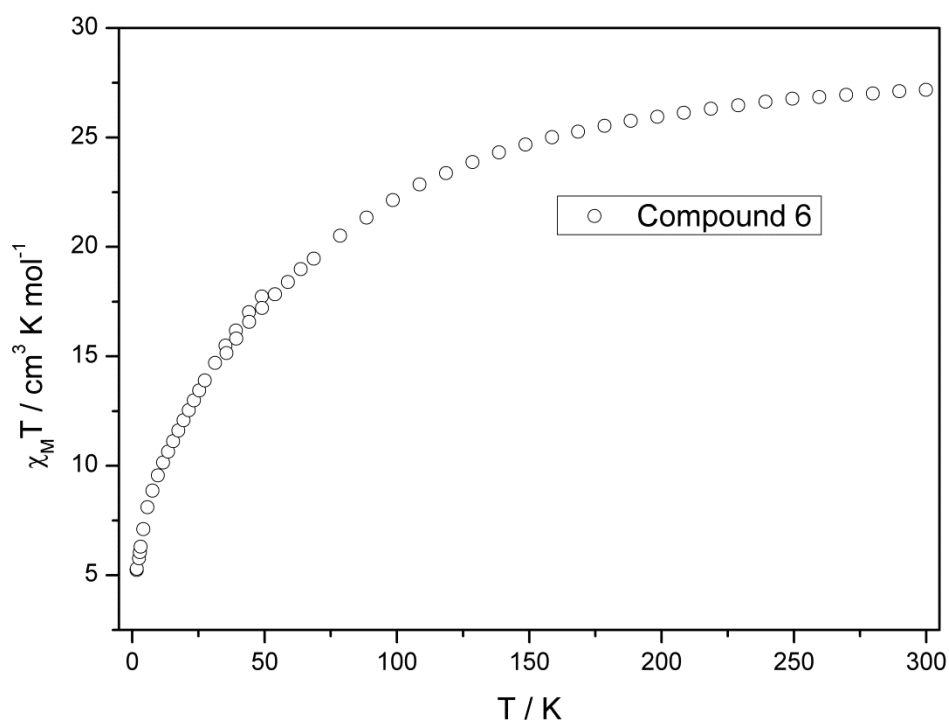

**Figure S2.** Plot of  $\chi_M T$  vs  $T$  for compound **6**.

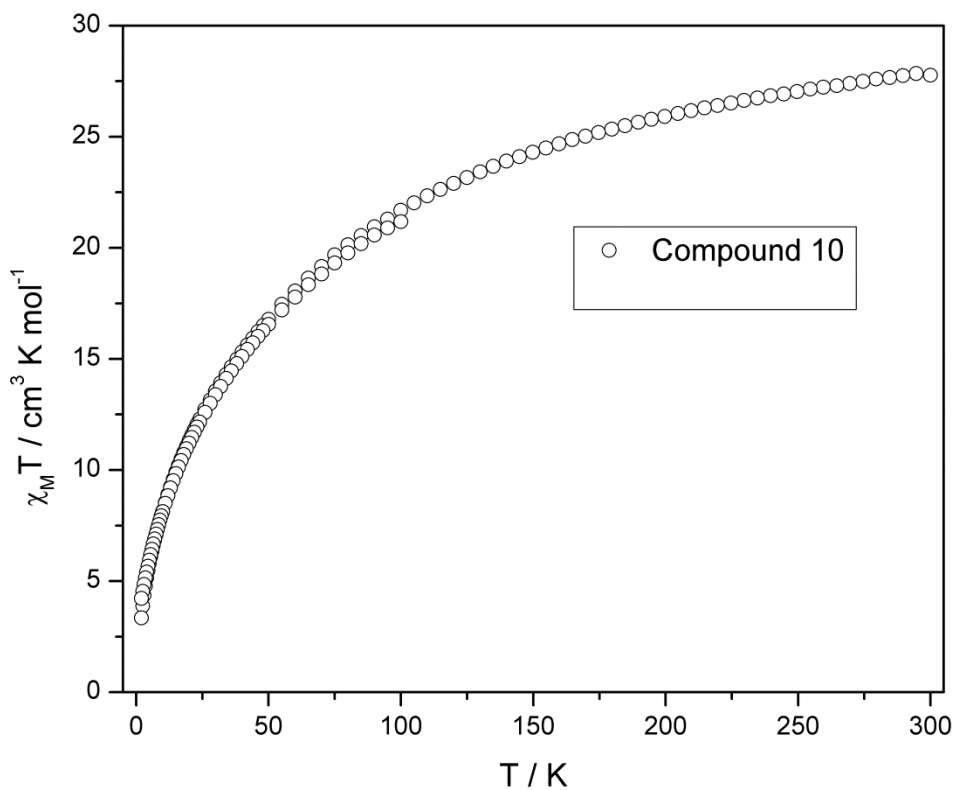

**Figure S3.** Plot of  $\chi_M T$  vs  $T$  for compound **10**.

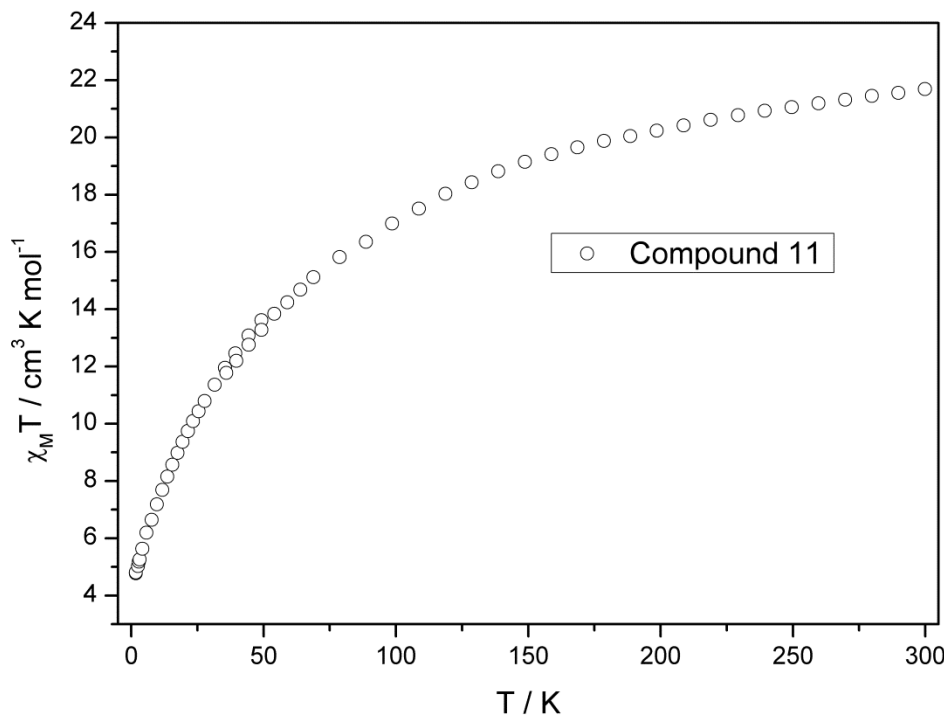

**Figure S4.** Plot of  $\chi_M T$  vs  $T$  for compound **11**.

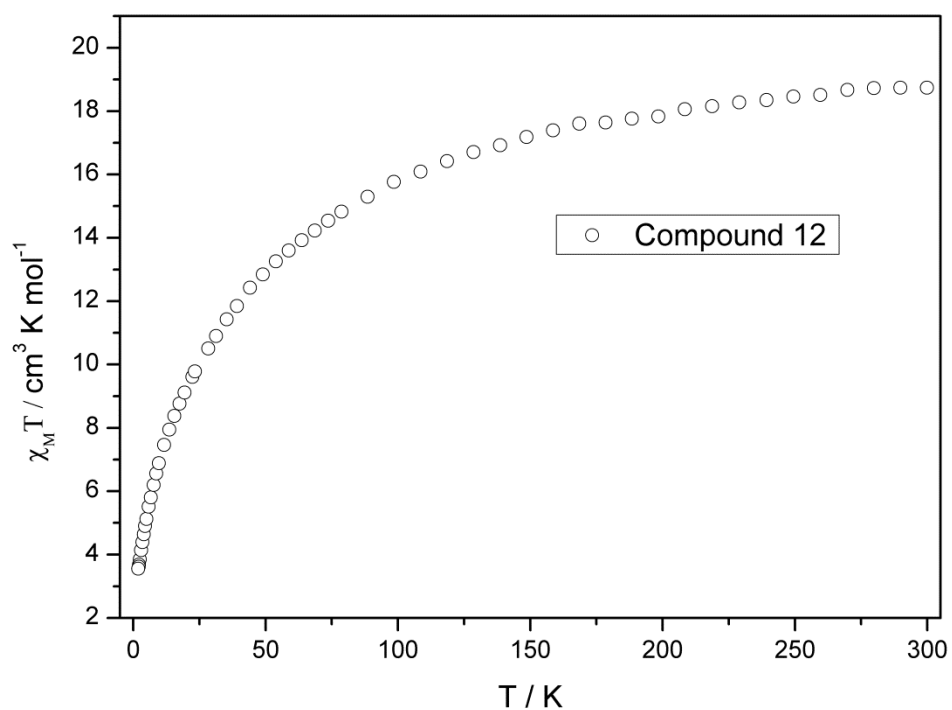

**Figure S5.** Plot of  $\chi_M T$  vs  $T$  for compound **12**.

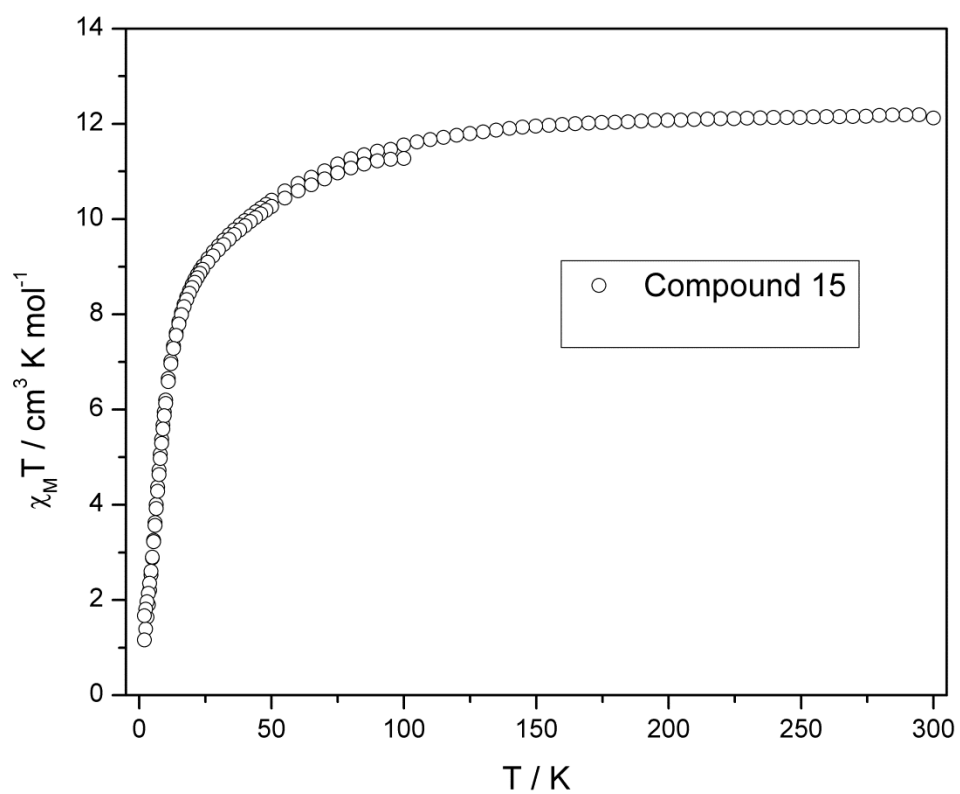

**Figure S6.** Plot of  $\chi_M T$  vs  $T$  for compound **15**.
